# Supplementary material for: Outcome prediction based on microarray analysis: a critical perspective on methods
Source: Springer Nature journal article supplement (doi:10.1186/1471-2105-10-53), 2009-02-07

**(A) Breast cancer**

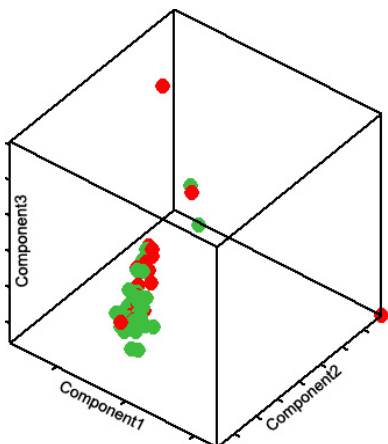

**(B) Leukemia**

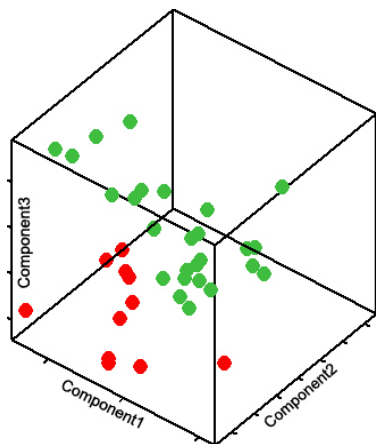

**(C) Colon Cancer**

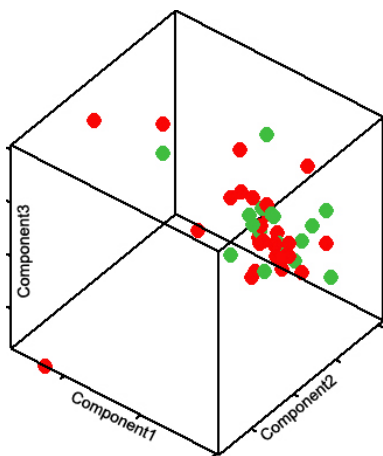

Supplement: 12859_2008_2783_MOESM1_ESM.pdf [file 12859_2008_2783_MOESM1_ESM.pdf]
