# Supplementary material for: Outcome prediction based on microarray analysis: a critical perspective on methods
Source: Springer Nature journal article supplement (doi:10.1186/1471-2105-10-53), 2009-02-07

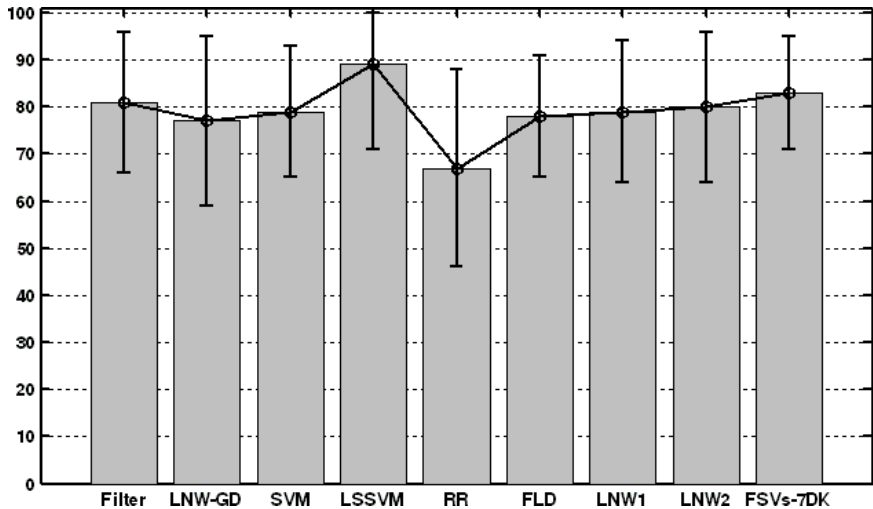

Supplement: 12859_2008_2783_MOESM4_ESM.pdf [file 12859_2008_2783_MOESM4_ESM.pdf]
