# Supplementary material for: Outcome prediction based on microarray analysis: a critical perspective on methods
Source: Springer Nature journal article supplement (doi:10.1186/1471-2105-10-53), 2009-02-07

**(A) Filter**

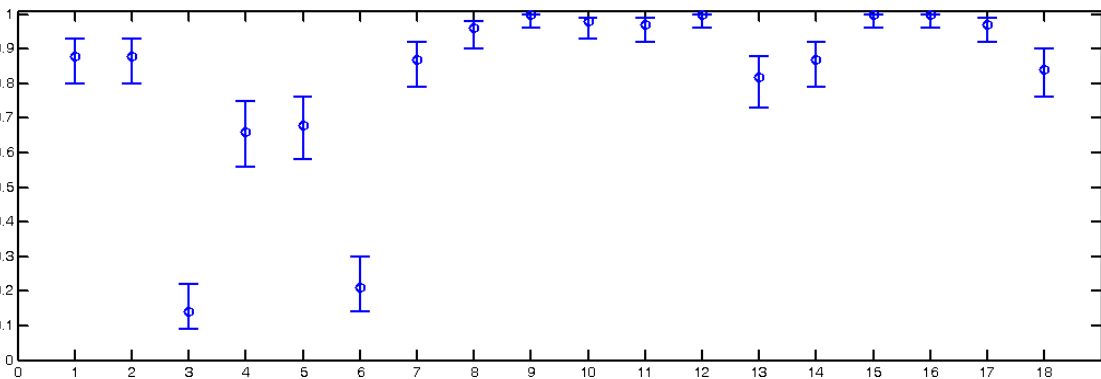

**(B) RFE-SVM**

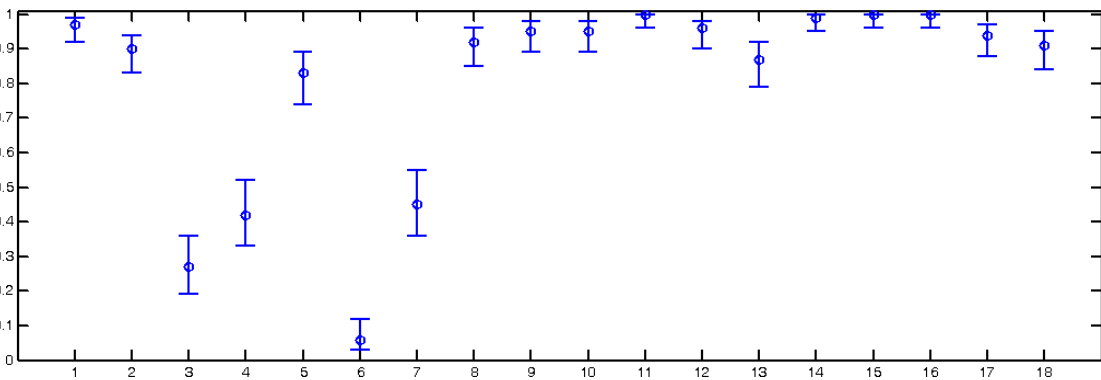

**(C) RFE-LNW1**

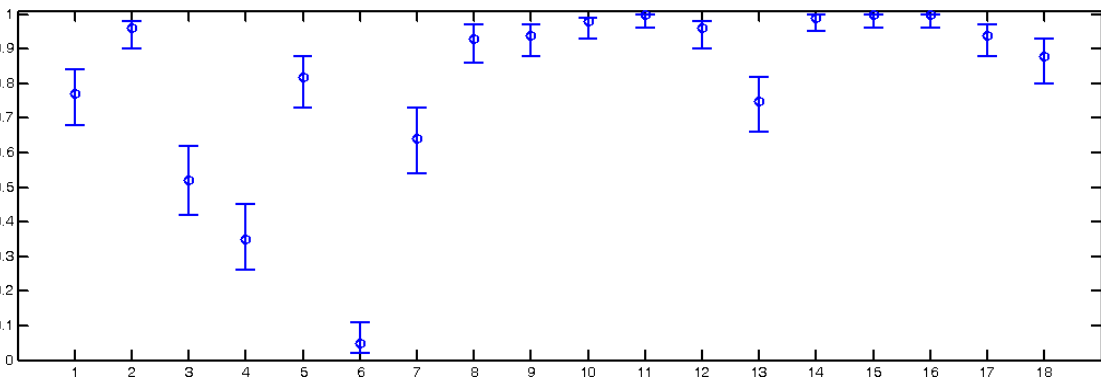

Supplement: 12859_2008_2783_MOESM7_ESM.pdf [file 12859_2008_2783_MOESM7_ESM.pdf]
